# Supplementary material for: Whole genome expression analysis within the angiotensin II-apolipoprotein E deficient mouse model of abdominal aortic aneurysm
Source: PubMed Central journal article supplement (PMC2728106; doi:10.1186/1471-2164-10-298), 2009-07-06
Supplement: 1471-2164-10-298-S2.pdf [file 1471-2164-10-298-S2.pdf]

**Supplementary Table 2. Number of differentially expressed genes (2 fold, p<0.05) in the aortas of mice with and without aneurysms and saline controls**

| <b>Group</b>           | <b>Aneurysm</b>        | <b>No aneurysm</b>     | <b>Saline controls</b> |
|------------------------|------------------------|------------------------|------------------------|
| <b>Aneurysm</b>        | -                      | 531 (446 up, 85 down)  | 1196(749 up, 447 down) |
| <b>No aneurysm</b>     | 531 (446 up, 85 down)  | -                      | 654 (128 up, 526 down) |
| <b>Saline controls</b> | 1196(749 up, 447 down) | 654 (128 up, 526 down) | -                      |
