# Supplementary material for: Whole genome expression analysis within the angiotensin II-apolipoprotein E deficient mouse model of abdominal aortic aneurysm
Source: PubMed Central journal article supplement (PMC2728106; doi:10.1186/1471-2164-10-298), 2009-07-06
Supplement: 1471-2164-10-298-S8.pdf [file 1471-2164-10-298-S8.pdf]

| <b>Gene symbol</b> | <b>Gene ID</b> | <b>Description</b>                                       | <b>Fold decrease of AAA</b> | <b>P value</b> | <b>Fold decrease of saline</b> | <b>P value</b> |
|--------------------|----------------|----------------------------------------------------------|-----------------------------|----------------|--------------------------------|----------------|
| <i>Kngr1</i>       | 16644          | Kininogen 1                                              | 4.117                       | 0.00109        | 4.184                          | 9.47E-06       |
| <i>Apoc1</i> †     | 11812          | apolipoprotein C-I                                       | 3.408                       | 0.00301        | 4.405                          | 0.00017        |
| <i>Fgl1</i>        | 234199         | fibrinogen-like protein 1                                | 2.182                       | 0.0138         | 2.591                          | 0.00112        |
| <i>Stxbp2</i> †    | 20911          | syntaxin binding protein 2                               | 2.281                       | 0.000228       | 2.624                          | 3.32E-06       |
| <i>Lrg1</i>        | 76905          | leucine-rich alpha-2-glycoprotein 1                      | 2.219                       | 0.0142         | 2.583                          | 0.00269        |
| <i>Gpx3</i>        | 14778          | glutathione peroxidase 3                                 | 2.597                       | 0.000815       | 3.344                          | 4.92E-06       |
| <i>Hp</i>          | 15439          | haptoglobin                                              | 2.275                       | 0.001          | 2.857                          | 0.00499        |
| <i>Chst1</i>       | 76969          | carbohydrate (keratan sulphate Gal-6) sulfotransferase 1 | 2.009                       | 0.0255         | 2.439                          | 0.000843       |
| <i>Eltf1</i>       | 170757         | EGF, latrophilin seven transmembrane domain containing 1 | 2.109                       | 0.00424        | 2.336                          | 5.48E-06       |
| <i>Robo4</i>       | 74144          | roundabout homolog 4                                     | 2.602                       | 0.00527        | 2.618                          | 2.76E-05       |
