# Supplementary material for: Whole genome expression analysis within the angiotensin II-apolipoprotein E deficient mouse model of abdominal aortic aneurysm
Source: PubMed Central journal article supplement (PMC2728106; doi:10.1186/1471-2164-10-298), 2009-07-06

# Supplemental Figure 1

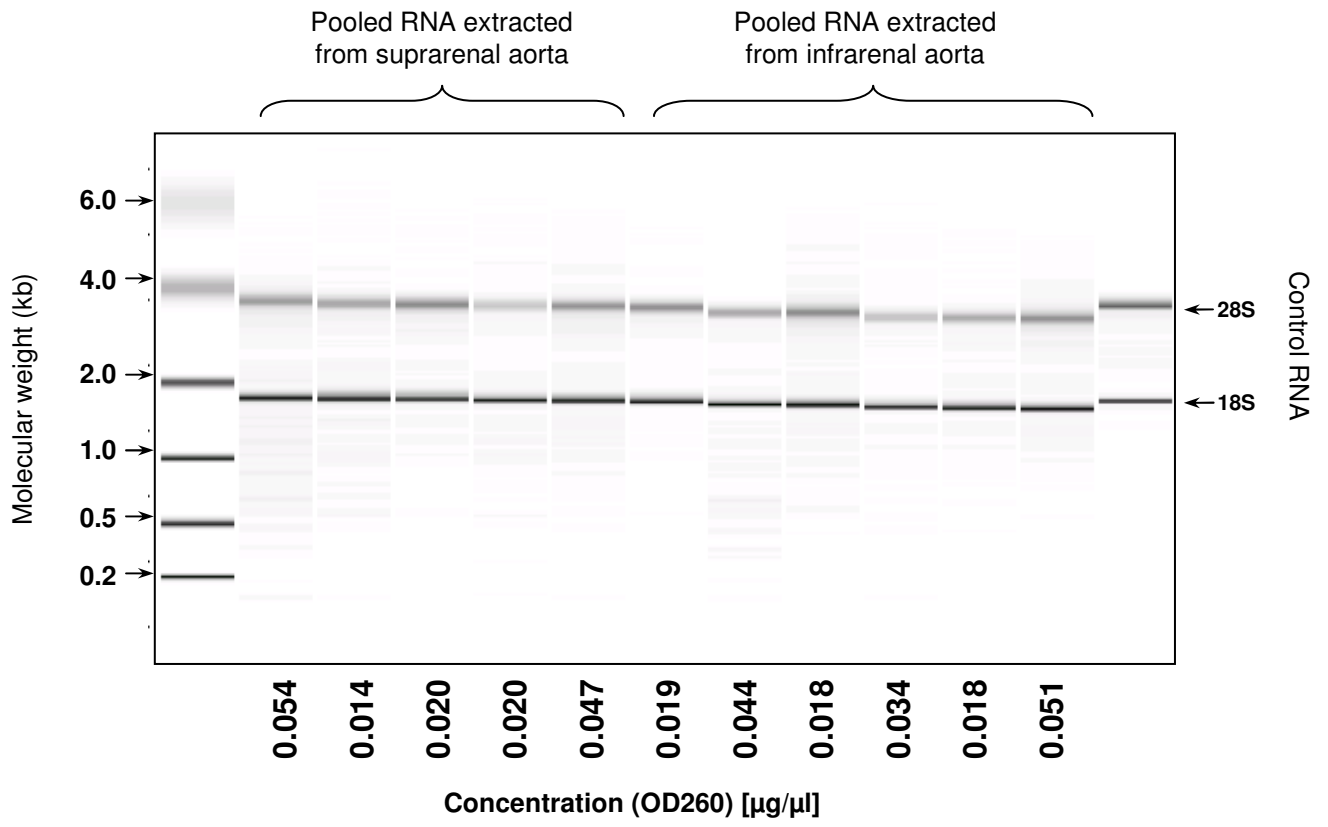

Supplement: 1471-2164-10-298-S11.pdf [file 1471-2164-10-298-S11.pdf]
